# Supplementary material
Source: Springer Nature journal article supplement (https://www.springermedizin.de/resource/supplementary/13018_2006_33_MOESM2_ESM.pdf/9636182)

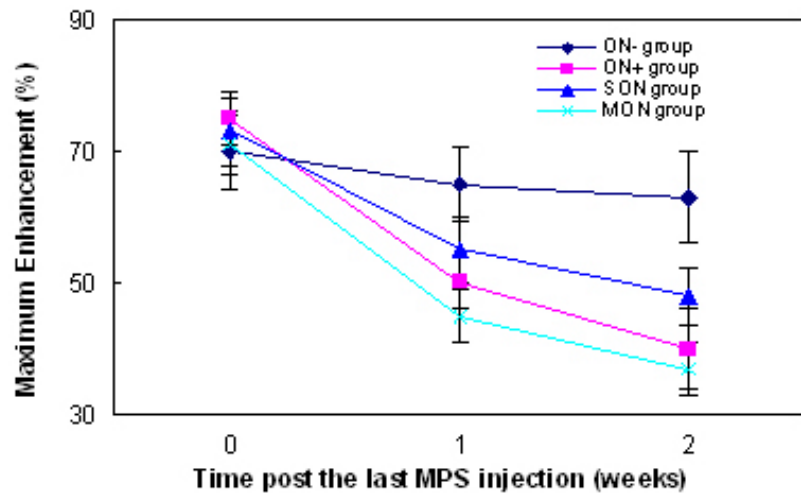

A

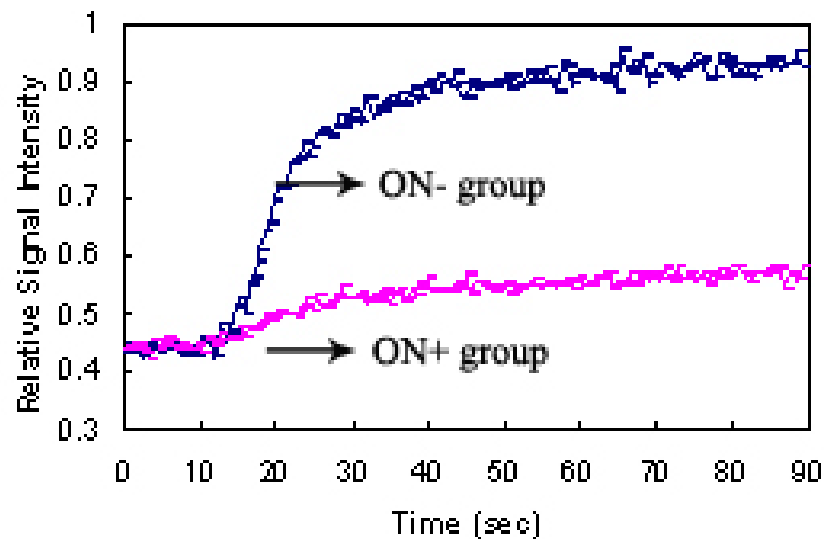

B

Supplement: MOESM2 [file 9636182]
